# Supplementary material
Source: Research Square preprint supplement (doi:10.21203/rs.3.rs-9627410/v1)
Supplement: Supplementary file 2 [file 4e10dbef97d76964c95eb764.xlsx]

## Sheet: F1CDx
Mutation	Cancer type	MT	WT	P-value	Effect_size
TP53_F1CDx	Head and neck	32	21	0.0148112	-0.551059
PIK3CA_F1CDx	Colon and rectum	10	74	0.0181734	-0.868991
BRAF_F1CDx	Colon and rectum	5	79	0.0481843	-0.986448
NRAS_F1CDx	Malognant melanoma	6	21	0.102261	1.02168
PIK3CA_F1CDx	Stomach	5	24	0.118987	0.803029
TP53_F1CDx	Prostate	7	16	0.132271	0.423419
CDH1_F1CDx	Stomach	5	24	0.193876	-0.602024
ATM_F1CDx	Colon and rectum	6	78	0.201721	-0.677652
TP53_F1CDx	Ureters and bladder	10	5	0.20646	-0.980845
TP53_F1CDx	Ovarian, fallopian tube	39	14	0.226058	0.388378
TP53_F1CDx	Colon and rectum	59	25	0.242328	-0.317238
APC_F1CDx	Colon and rectum	64	20	0.250119	0.290042
KRAS_F1CDx	Colon and rectum	29	55	0.252971	-0.295143
PTEN_F1CDx	Breast	5	54	0.264432	-0.538912
CDKN2A_F1CDx	Head and neck	9	44	0.30275	-0.145693
PIK3CA_F1CDx	Head and neck	7	46	0.415389	-0.118171
BRCA1_F1CDx	Head and neck	5	48	0.428816	0.266833
KRAS_F1CDx	Biliary tract	6	18	0.483642	-0.406596
TERT_F1CDx	Ureters and bladder	7	8	0.53582	0.447566
TP53_F1CDx	Biliary tract	12	12	0.544107	0.213787
PIK3CA_F1CDx	Breast	27	32	0.552901	0.100445
TP53_F1CDx	Pancreas	46	10	0.630236	0.223809
EGFR_F1CDx	Head and neck	5	48	0.637149	0.137559
TP53_F1CDx	Stomach	15	14	0.678387	0.151719
APC_F1CDx	Prostate	5	18	0.709045	0.105063
AKT1_F1CDx	Breast	6	53	0.753894	0.270586
CDH1_F1CDx	Breast	9	50	0.767863	0.00819599
CDKN2A_F1CDx	Pancreas	12	44	0.810608	0.0548164
CTNNB1_F1CDx	Colon and rectum	5	79	0.820518	0.0490313
ESR1_F1CDx	Breast	6	53	0.831182	0
TERT_F1CDx	Malognant melanoma	6	21	0.861024	0.077406
PIK3CA_F1CDx	Uterus corpus	7	8	0.866511	0.302324
TP53_F1CDx	Uterus corpus	8	7	0.866511	-0.0954652
TP53_F1CDx	Breast	11	48	0.868593	0.1997
TP53_F1CDx	Liver	5	9	0.893463	-0.309844
RB1_F1CDx	Head and neck	5	48	0.963591	-0.149264
KRAS_F1CDx	Pancreas	49	7	0.970353	0.0223812
TERT_F1CDx	Head and neck	17	36	0.977195	-0.000535031

## Sheet: F1L or F1LCDx
Mutation	Cancer type	MT	WT	P-value	Effect_size
GNAS_F1L_F1LCDx	Colon and rectum	9	177	0.0038386	-0.959491
BRAF_F1L_F1LCDx	Colon and rectum	18	168	0.00422571	-0.690772
ERBB2_F1L_F1LCDx	Stomach	5	79	0.0190465	1.05996
APC_F1L_F1LCDx	Colon and rectum	128	58	0.0208356	0.336904
PIK3CA_F1L_F1LCDx	Colon and rectum	22	164	0.0240484	-0.534788
TP53_F1L_F1LCDx	Pancreas	82	59	0.0308695	0.306016
ATM_F1L_F1LCDx	Pancreas	9	132	0.0845554	0.571856
BRCA2_F1L_F1LCDx	Colon and rectum	9	177	0.106923	-0.493137
JAK2_F1L_F1LCDx	Pancreas	6	135	0.12422	0.495408
KRAS_F1L_F1LCDx	Stomach	6	78	0.12635	0.596447
PIK3CA_F1L_F1LCDx	Uterus corpus	7	7	0.128205	-0.569644
PTEN_F1L_F1LCDx	Head and neck	8	75	0.134448	-0.42791
TP53_F1L_F1LCDx	Renal	8	27	0.151499	0.683661
TP53_F1L_F1LCDx	Ureters and bladder	30	19	0.159793	-0.493057
TERT_F1L_F1LCDx	Liver	11	12	0.195977	-0.455362
GNAS_F1L_F1LCDx	Pancreas	9	132	0.224534	0.24547
CDKN2A_F1L_F1LCDx	Pancreas	13	128	0.239633	0.311907
CDKN2A_F1L_F1LCDx	Head and neck	10	73	0.281394	-0.387015
MTOR_F1L_F1LCDx	Colon and rectum	5	181	0.28486	-0.467536
TP53_F1L_F1LCDx	Uterus corpus	8	6	0.344988	-0.368635
TP53_F1L_F1LCDx	Liver	10	13	0.351998	0.154777
FGFR3_F1L_F1LCDx	Ureters and bladder	5	44	0.37245	-0.518674
PIK3CA_F1L_F1LCDx	Breast	34	59	0.382345	-0.141703
TP53_F1L_F1LCDx	Breast	41	52	0.383977	0.274864
APC_F1L_F1LCDx	Stomach	9	75	0.40558	0.238987
AKT1_F1L_F1LCDx	Breast	7	86	0.410609	0.18802
CTNNB1_F1L_F1LCDx	Liver	5	18	0.412047	-0.200153
TP53_F1L_F1LCDx	Ovarian, fallopian tube	43	17	0.435799	-0.158637
PIK3CA_F1L_F1LCDx	Biliary tract	7	53	0.468205	0.229726
ATM_F1L_F1LCDx	Colon and rectum	13	173	0.47576	-0.214751
TERT_F1L_F1LCDx	Ureters and bladder	10	39	0.543288	-0.288723
TP53_F1L_F1LCDx	Biliary tract	30	30	0.54438	-0.11812
PIK3CA_F1L_F1LCDx	Head and neck	10	73	0.552141	0.165077
RB1_F1L_F1LCDx	Colon and rectum	5	181	0.578358	-0.271613
TP53_F1L_F1LCDx	Prostate	21	51	0.628929	0.093494
ATM_F1L_F1LCDx	Head and neck	6	77	0.641213	0.0129989
GNAS_F1L_F1LCDx	Stomach	6	78	0.676748	-0.134809
ATM_F1L_F1LCDx	Prostate	7	65	0.696754	0.122435
ATM_F1L_F1LCDx	Biliary tract	5	55	0.778823	-0.059817
ROS1_F1L_F1LCDx	Colon and rectum	5	181	0.790808	0.00958619
TP53_F1L_F1LCDx	Colon and rectum	141	45	0.825067	-0.0381626
TERT_F1L_F1LCDx	Head and neck	19	64	0.853804	0.0665593
ESR1_F1L_F1LCDx	Breast	18	75	0.857221	-0.0971956
GNAS_F1L_F1LCDx	Ureters and bladder	5	44	0.881831	-0.189295
KRAS_F1L_F1LCDx	Colon and rectum	54	132	0.91636	-0.0604016
KRAS_F1L_F1LCDx	Pancreas	78	63	0.917425	0.036144
TP53_F1L_F1LCDx	Head and neck	42	41	0.938287	-0.0594061
PIK3CA_F1L_F1LCDx	Stomach	8	76	0.945322	0.0887697
PTEN_F1L_F1LCDx	Colon and rectum	6	180	0.950827	-0.0841554
PIK3CA_F1L_F1LCDx	Ureters and bladder	6	43	0.987831	0.306923
KRAS_F1L_F1LCDx	Biliary tract	10	50	0.992086	-0.0525869
TP53_F1L_F1LCDx	Stomach	51	33	0.992691	0.0108197

## Sheet: F1CDx_pathogenic
Mutation	Cancer type	MT	WT	P-value	Effect_size
TP53_F1CDx_pathogenic	Head and neck	32	21	0.0148112	-0.551059
PIK3CA_F1CDx_pathogenic	Colon and rectum	10	74	0.0181734	-0.868991
BRAF_F1CDx_pathogenic	Colon and rectum	5	79	0.0481843	-0.986448
CDKN2A_F1CDx_pathogenic	Head and neck	5	48	0.080151	-0.702311
NRAS_F1CDx_pathogenic	Malognant melanoma	6	21	0.102261	1.02168
TP53_F1CDx_pathogenic	Prostate	7	16	0.132271	0.423419
TP53_F1CDx_pathogenic	Ureters and bladder	10	5	0.20646	-0.980845
TP53_F1CDx_pathogenic	Ovarian, fallopian tube	39	14	0.226058	0.388378
TP53_F1CDx_pathogenic	Colon and rectum	59	25	0.242328	-0.317238
APC_F1CDx_pathogenic	Colon and rectum	64	20	0.250119	0.290042
KRAS_F1CDx_pathogenic	Colon and rectum	29	55	0.252971	-0.295143
PTEN_F1CDx_pathogenic	Breast	5	54	0.264432	-0.538912
TP53_F1CDx_pathogenic	Biliary tract	11	13	0.270673	0.383613
TP53_F1CDx_pathogenic	Uterus corpus	7	8	0.396892	0.193691
PIK3CA_F1CDx_pathogenic	Head and neck	7	46	0.415389	-0.118171
KRAS_F1CDx_pathogenic	Biliary tract	6	18	0.483642	-0.406596
TERT_F1CDx_pathogenic	Ureters and bladder	7	8	0.53582	0.447566
PIK3CA_F1CDx_pathogenic	Breast	27	32	0.552901	0.100445
CDKN2A_F1CDx_pathogenic	Pancreas	9	47	0.607837	0.145087
TP53_F1CDx_pathogenic	Pancreas	46	10	0.630236	0.223809
TP53_F1CDx_pathogenic	Stomach	15	14	0.678387	0.151719
AKT1_F1CDx_pathogenic	Breast	6	53	0.753894	0.270586
CDH1_F1CDx_pathogenic	Breast	8	51	0.8594	0.0203397
TERT_F1CDx_pathogenic	Malognant melanoma	6	21	0.861024	0.077406
PIK3CA_F1CDx_pathogenic	Uterus corpus	7	8	0.866511	0.302324
TP53_F1CDx_pathogenic	Breast	11	48	0.868593	0.1997
TERT_F1CDx_pathogenic	Head and neck	16	37	0.884457	-0.0453649
TP53_F1CDx_pathogenic	Liver	5	9	0.893463	-0.309844
KRAS_F1CDx_pathogenic	Pancreas	49	7	0.970353	0.0223812
ESR1_F1CDx_pathogenic	Breast	5	54	0.989142	0.0956546

## Sheet: F1L or F1LCDx pathogenic
Mutation	Cancer type	MT	WT	P-value	Effect_size
BRAF_F1L_F1LCDx_pathogenic	Colon and rectum	18	168	0.00422571	-0.690772
ERBB2_F1L_F1LCDx_pathogenic	Stomach	5	79	0.0190465	1.05996
APC_F1L_F1LCDx_pathogenic	Colon and rectum	128	58	0.0208356	0.336904
GNAS_F1L_F1LCDx_pathogenic	Colon and rectum	6	180	0.0303024	-0.853176
TP53_F1L_F1LCDx_pathogenic	Pancreas	82	59	0.0308695	0.306016
PIK3CA_F1L_F1LCDx_pathogenic	Colon and rectum	20	166	0.0350159	-0.525724
JAK2_F1L_F1LCDx_pathogenic	Pancreas	5	136	0.113406	0.580086
KRAS_F1L_F1LCDx_pathogenic	Stomach	6	78	0.12635	0.596447
PIK3CA_F1L_F1LCDx_pathogenic	Uterus corpus	7	7	0.128205	-0.569644
PTEN_F1L_F1LCDx_pathogenic	Head and neck	8	75	0.134448	-0.42791
TP53_F1L_F1LCDx_pathogenic	Renal	8	27	0.151499	0.683661
TP53_F1L_F1LCDx_pathogenic	Ureters and bladder	30	19	0.159793	-0.493057
GNAS_F1L_F1LCDx_pathogenic	Pancreas	7	134	0.167247	0.343954
ATM_F1L_F1LCDx_pathogenic	Pancreas	7	134	0.183882	0.510658
TERT_F1L_F1LCDx_pathogenic	Liver	11	12	0.195977	-0.455362
PIK3CA_F1L_F1LCDx_pathogenic	Breast	32	61	0.302466	-0.1653
CDKN2A_F1L_F1LCDx_pathogenic	Head and neck	9	74	0.333717	-0.361491
TP53_F1L_F1LCDx_pathogenic	Uterus corpus	8	6	0.344988	-0.368635
CDKN2A_F1L_F1LCDx_pathogenic	Pancreas	10	131	0.351479	0.282831
TP53_F1L_F1LCDx_pathogenic	Liver	10	13	0.351998	0.154777
FGFR3_F1L_F1LCDx_pathogenic	Ureters and bladder	5	44	0.37245	-0.518674
TP53_F1L_F1LCDx_pathogenic	Breast	41	52	0.383977	0.274864
PIK3CA_F1L_F1LCDx_pathogenic	Biliary tract	6	54	0.388421	0.28011
APC_F1L_F1LCDx_pathogenic	Stomach	9	75	0.40558	0.238987
AKT1_F1L_F1LCDx_pathogenic	Breast	7	86	0.410609	0.18802
CTNNB1_F1L_F1LCDx_pathogenic	Liver	5	18	0.412047	-0.200153
TP53_F1L_F1LCDx_pathogenic	Ovarian, fallopian tube	43	17	0.435799	-0.158637
TERT_F1L_F1LCDx_pathogenic	Ureters and bladder	10	39	0.543288	-0.288723
TP53_F1L_F1LCDx_pathogenic	Biliary tract	30	30	0.54438	-0.11812
PIK3CA_F1L_F1LCDx_pathogenic	Head and neck	10	73	0.552141	0.165077
TP53_F1L_F1LCDx_pathogenic	Prostate	21	51	0.628929	0.093494
ATM_F1L_F1LCDx_pathogenic	Head and neck	6	77	0.641213	0.0129989
ESR1_F1L_F1LCDx_pathogenic	Breast	17	76	0.679939	-0.140694
TP53_F1L_F1LCDx_pathogenic	Colon and rectum	141	45	0.825067	-0.0381626
ATM_F1L_F1LCDx_pathogenic	Colon and rectum	9	177	0.86393	-0.0810797
KRAS_F1L_F1LCDx_pathogenic	Colon and rectum	54	132	0.91636	-0.0604016
KRAS_F1L_F1LCDx_pathogenic	Pancreas	78	63	0.917425	0.036144
TP53_F1L_F1LCDx_pathogenic	Head and neck	42	41	0.938287	-0.0594061
PIK3CA_F1L_F1LCDx_pathogenic	Stomach	8	76	0.945322	0.0887697
PTEN_F1L_F1LCDx_pathogenic	Colon and rectum	6	180	0.950827	-0.0841554
TERT_F1L_F1LCDx_pathogenic	Head and neck	18	65	0.964744	0.0248865
TP53_F1L_F1LCDx_pathogenic	Stomach	50	34	0.985456	0.0247713
PIK3CA_F1L_F1LCDx_pathogenic	Ureters and bladder	6	43	0.987831	0.306923
KRAS_F1L_F1LCDx_pathogenic	Biliary tract	10	50	0.992086	-0.0525869
