# Supplementary material
Source: Research Square preprint supplement (doi:10.21203/rs.3.rs-9627410/v1)
Supplement: Supplementary file 3 [file 781cb677c17ad83e4f7a6a02.xlsx]

## Sheet: Table 2
Characteristic	Overall (N=84)	PIK3CA-mutant (N=10)	PIK3CA-wildtype (N=74)	P-value
Age (years)
Mean (SD)	62.1 (12.7)	63.2 (16.6)	62.0 (12.4)	0.83
Gender, n (%)
Male	49 (58.3)	6 (60.0)	43 (58.1)	0.82
Female	35 (41.7)	4 (40.0)	31 (41.9)
Tumor location, n (%)
Left	59 (70.2)	8 (80.0)	51 (68.9)	0.92
Right	21 (25.0)	2 (20.0)	19 (25.7)
Unknown	4 (4.8)	0 (0)	4 (5.4)
Microsatellite instability status, n (%)
MSS	82 (97.6)	8 (80.0)	74 (100)	0.013
MSI-H	2 (2.4)	2 (20.0)	0 (0)
Abbreviations: SD, standard deviation; MSS, microsatellite stable; MSI-H, microsatellite instability-high.
